# Supplementary material for: Knowledge mapping and current trends of global research on snoRNA in the field of cancer
Source: Research Square preprint supplement (doi:10.21203/rs.3.rs-2628073/v1), 2023-03-01
Supplement: Supplementary file 1 [file 65c55ccf5ba891e292daeb14.xlsx]

## Sheet: Table 1
Table 1. The top 5 most active authors in the field of snoRNA and cancer.
Rank	Author	Publications	Citations	Average Citation/Publication
1	Chu, Liang	7	233	33.29
2	Montanaro, Lorenzo	7	152	21.71
3	Jiang, Feng	6	461	76.83
4	Yuan, Yufeng	5	170	34
5	Trere, Davide	5	48	9.6
