# Supplementary material for: Knowledge mapping and current trends of global research on snoRNA in the field of cancer
Source: Research Square preprint supplement (doi:10.21203/rs.3.rs-2628073/v1), 2023-03-01
Supplement: Supplementary file 2 [file 87beffeb0ec2aba913266890.xlsx]

## Sheet: Sheet1
Table 4. The top 5 most active organizations in the field of snoRNA and cancer.
Rank	Organization	Publications	Citations	Average Citation/Publication
1	Wuhan Univ	12	245	20.42
2	China Med Univ	12	216	18
3	Guangxi Med Univ	12	80	6.67
4	Univ Texas MdAnderson Canc Ctr	11	610	55.45
5	Huazhong Uni Sci & Technol	10	309	30.9
