# Supplementary material for: Knowledge mapping and current trends of global research on snoRNA in the field of cancer
Source: Research Square preprint supplement (doi:10.21203/rs.3.rs-2628073/v1), 2023-03-01
Supplement: Supplementary file 3 [file 902f56a1e3768bb20de62a93.xlsx]

## Sheet: Sheet1
Table 3. The top 5 most active countries/regions in the field of snoRNA and cancer.
Rank	Country	Publications	Citations	Average Citation/Publication
1	China	147	3259	22.17
2	USA	124	7579	61.12
3	Italy	39	1345	34.49
4	German	30	854	28.47
5	England	27	2489	92.19
