# Supplementary material for: Knowledge mapping and current trends of global research on snoRNA in the field of cancer
Source: Research Square preprint supplement (doi:10.21203/rs.3.rs-2628073/v1), 2023-03-01
Supplement: Supplementary file 4 [file a071ea221a5a7c1f03bc3edd.xlsx]

## Sheet: Sheet1
Table 5. The top 10 co-cited references in the field of snoRNA and cancer.
Rank	Title	Author	Year	Citations
1	Small nucleolar RNA 42 acts as an oncogene in lung tumorigenesis	Mei, YP	2012	107
2	SnoRNA U50 is a candidate tumor-suppressor gene at 6q14.3 with a mutation associated with clinically significant prostate cancer	Dong, XY	2008	91
4	Small nucleolar RNA signatures as biomarkers for non-small-cell lung cancer	Liao, JP	2010	91
3	Implication of snoRNA U50 in human breast cancer	Dong, XY	2009	85
6	Are snoRNAs and snoRNA host genes new players in cancer?	Williams, GT	2012	84
5	A Human snoRNA with MicroRNA-Like Functions	Ender, C	2008	81
7	Small nucleolar RNAs: An abundant group of noncoding RNAs with diverse cellular functions	Kiss, T	2002	72
8	The small-nucleolar RNAs commonly used for microRNA normalisation correlate with tumour pathology and prognosis	Gee, HE	2011	60
9	GAS5, a non-protein-coding RNA, controls apoptosis and is downregulated in breast cancer	Mourtada-Maarabouni, M	2009	57
10	Human box C/D snoRNAs with miRNA like functions: expanding the range of regulatory RNAs	Brameier, M	2011	55
