# Supplementary material for: Knowledge mapping and current trends of global research on snoRNA in the field of cancer
Source: Research Square preprint supplement (doi:10.21203/rs.3.rs-2628073/v1), 2023-03-01
Supplement: Supplementary file 5 [file a9ae23859a497be4440947f4.xlsx]

## Sheet: Sheet1
Table 2. The top 9 main journals in the field of snoRNA and cancer.
Rank	Source	Publications	Citations	Average Citation/Publication
1	Oncotarget	14	402	28.71
2	PLoSone	12	393	32.75
3	International Journal of Molecular Sciences	12	334	27.83
4	Oncogene	11	1347	122.45
5	Nucleic Acids Research	10	303	30.3
6	RNA Biology	9	301	33.44
7	Frontiers in Oncology	9	111	12.33
8	Molecular Cancer	8	661	82.63
9	Cancers	8	198	24.75
